# Supplementary material for: Comprehensive Evaluation of Commercial Bisulfite-Based DNA Methylation Kits and Development of an Alternative Protocol With Improved Conversion Performance
Source: PubMed Central journal article supplement — Genet Epigenet. 2018 Mar 22;10:1179237X18766097. doi: 10.1177/1179237X18766097 (PMC5888801; doi:10.1177/1179237x18766097), 2018-03-22
Supplement: 766097_Supplemental_Fig.1.pdf [file 766097_Supplemental_Fig.1.pdf]

A1\_EZ DNA Methylation; top: sulphonation 1x, bottom: sulphonation 2x

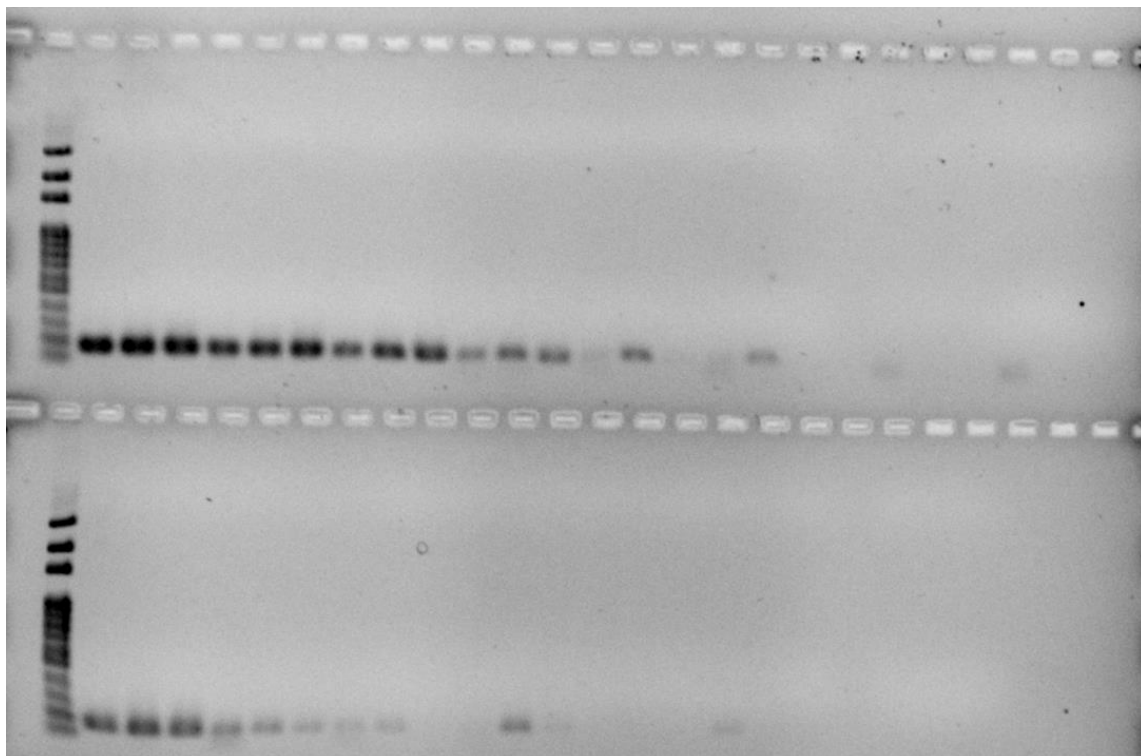

A1\_EZ DNA Methylation-Gold; top: sulphonation 1x, bottom: sulphonation 2x

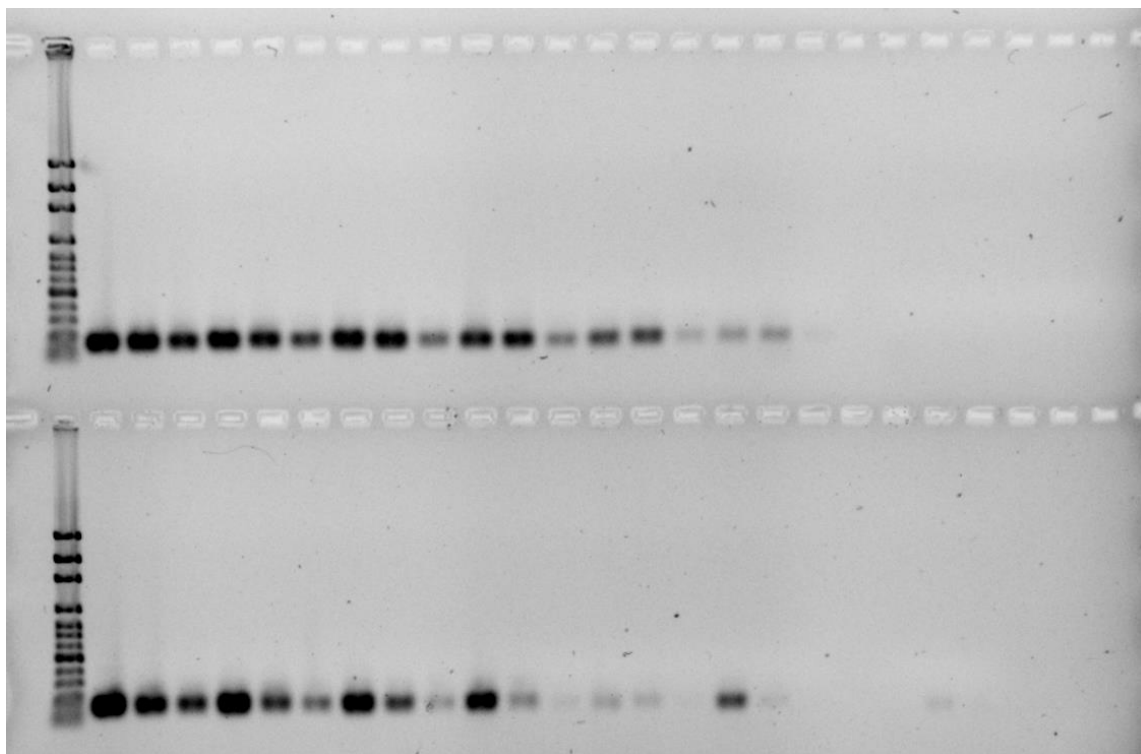

A1\_EZ DNA Methylation-Lightning; top: sulphonation 1x, bottom: sulphonation 2x

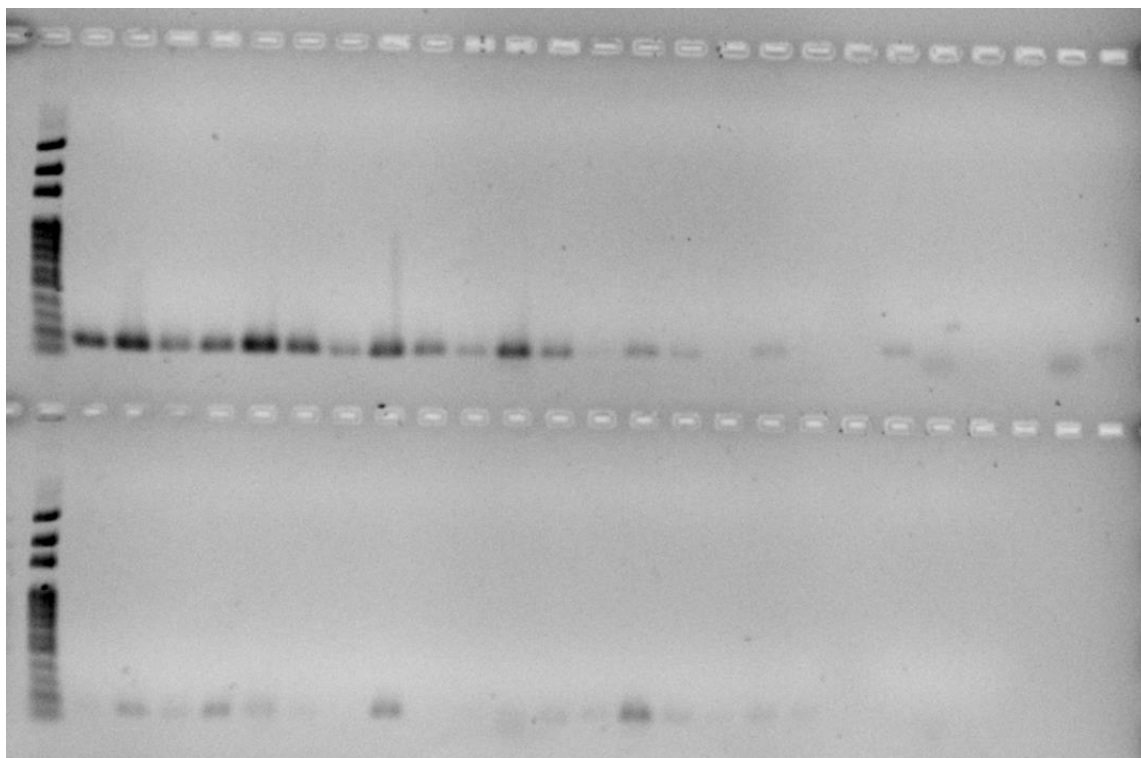

A1\_EpiTect Bisulfite; top: sulphonation 1x, bottom: sulphonation 2x

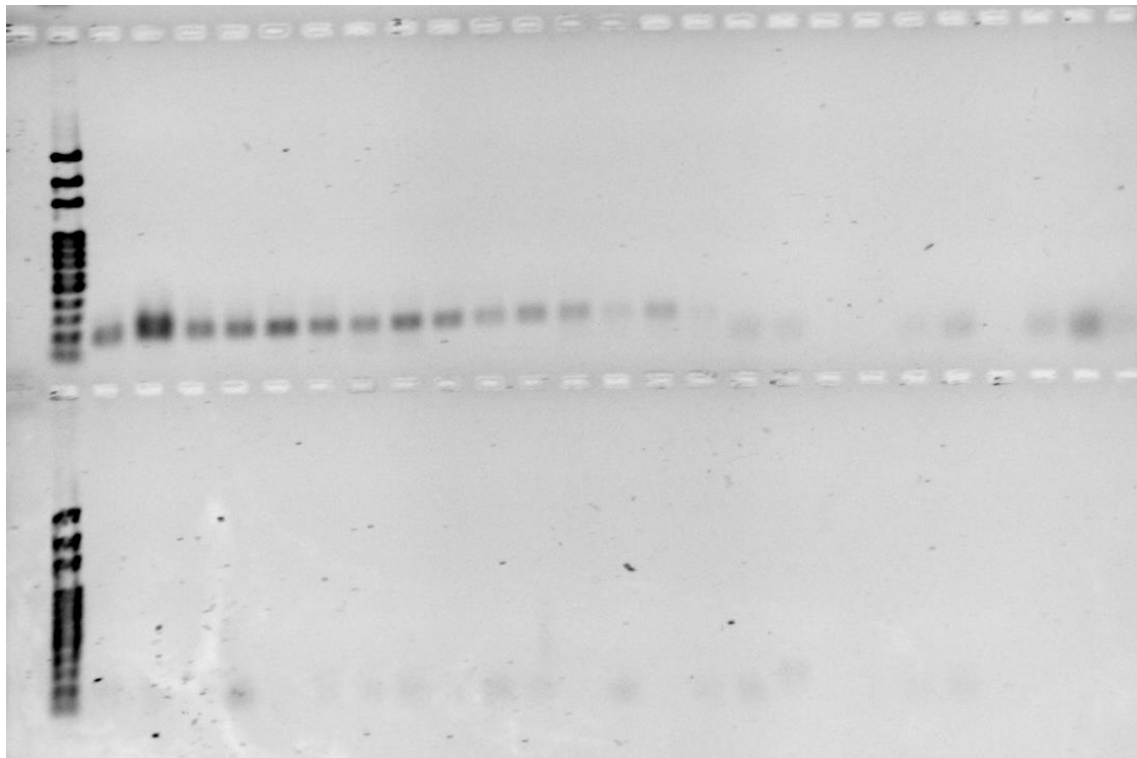

A1\_EpiTect Fast Bisulfite; top: sulphonation 1x, bottom: sulphonation 2x

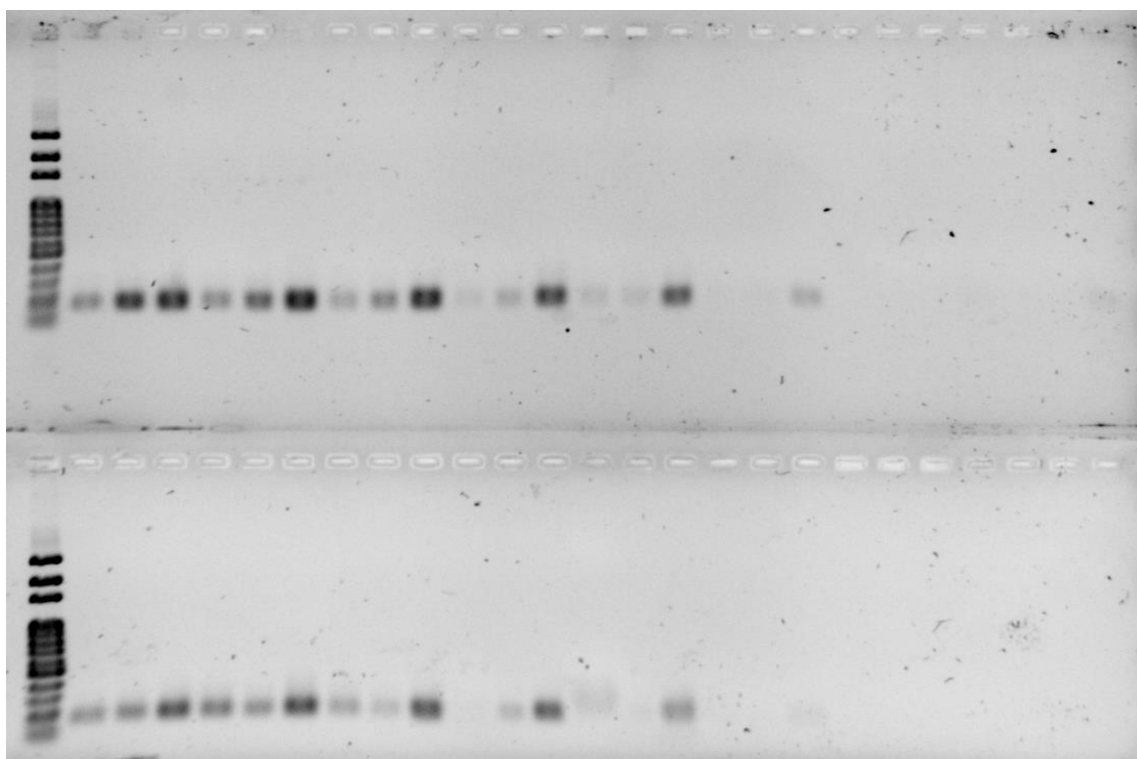

A1\_TrueMethyl Seq; top: sulphonation 1x, bottom: sulphonation 2x

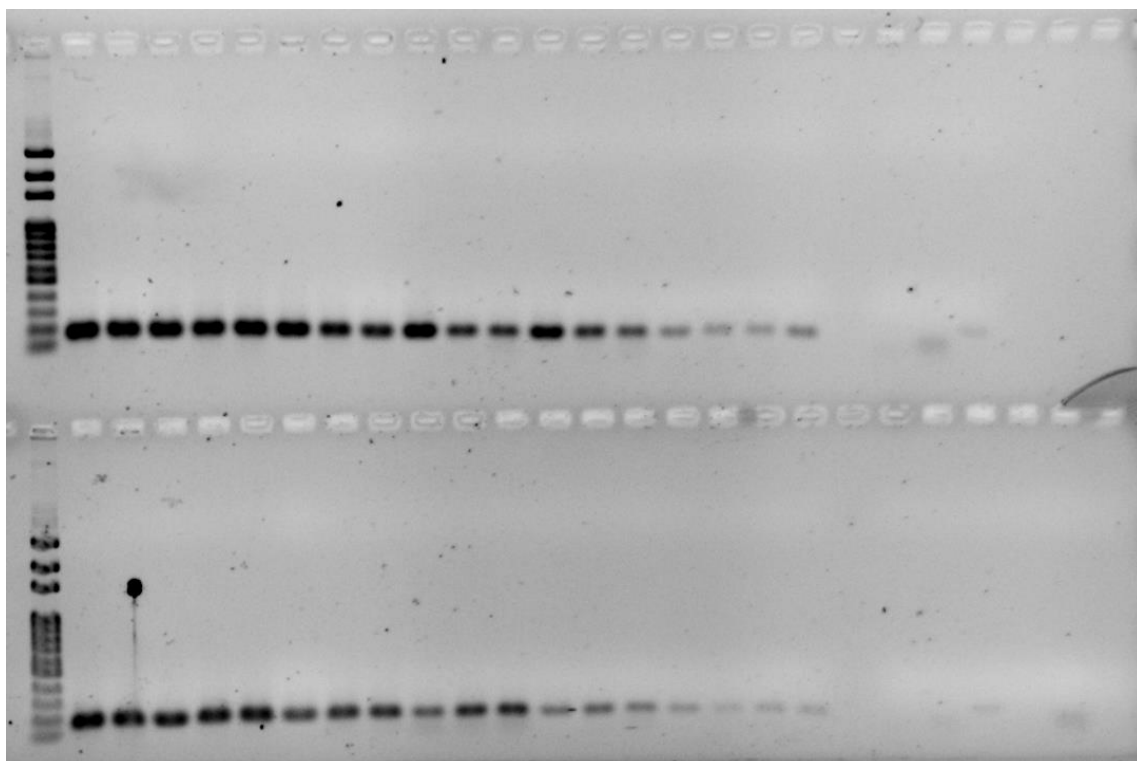

A1\_innuCONVERT; top: sulphonation 1x, bottom: sulphonation 2x

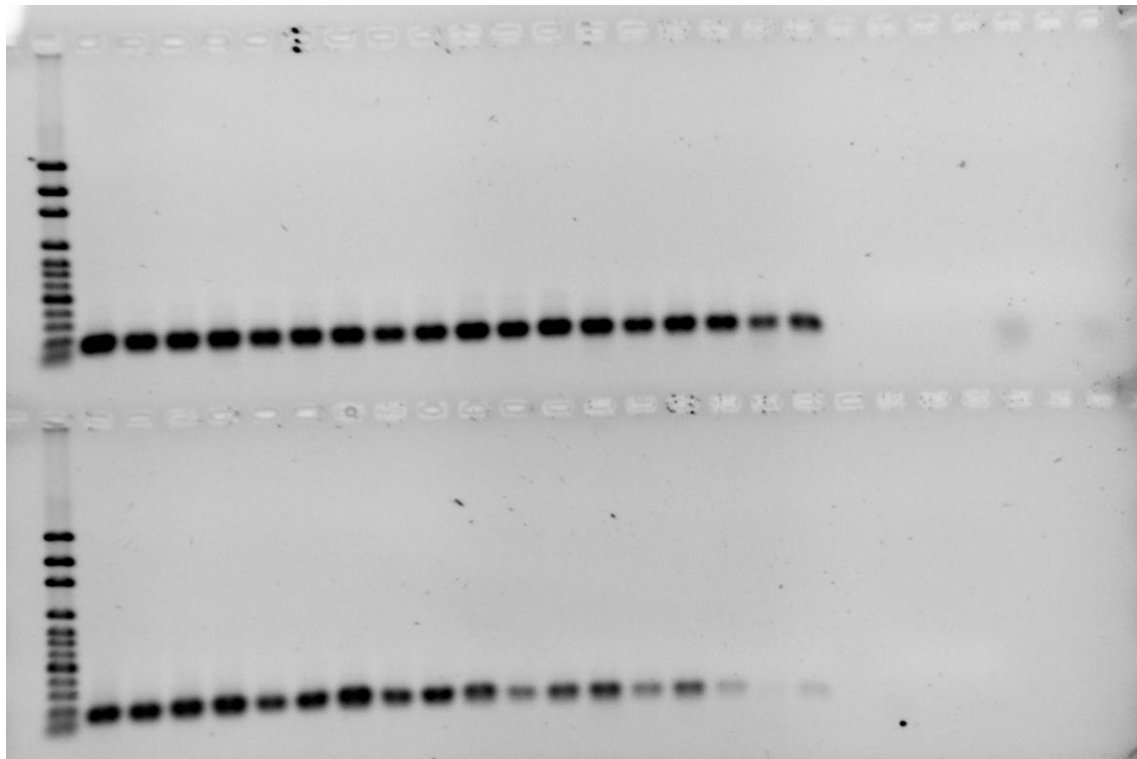

A1\_OPTI-Bisulfite; top: sulphonation 1x, bottom: sulphonation 2x

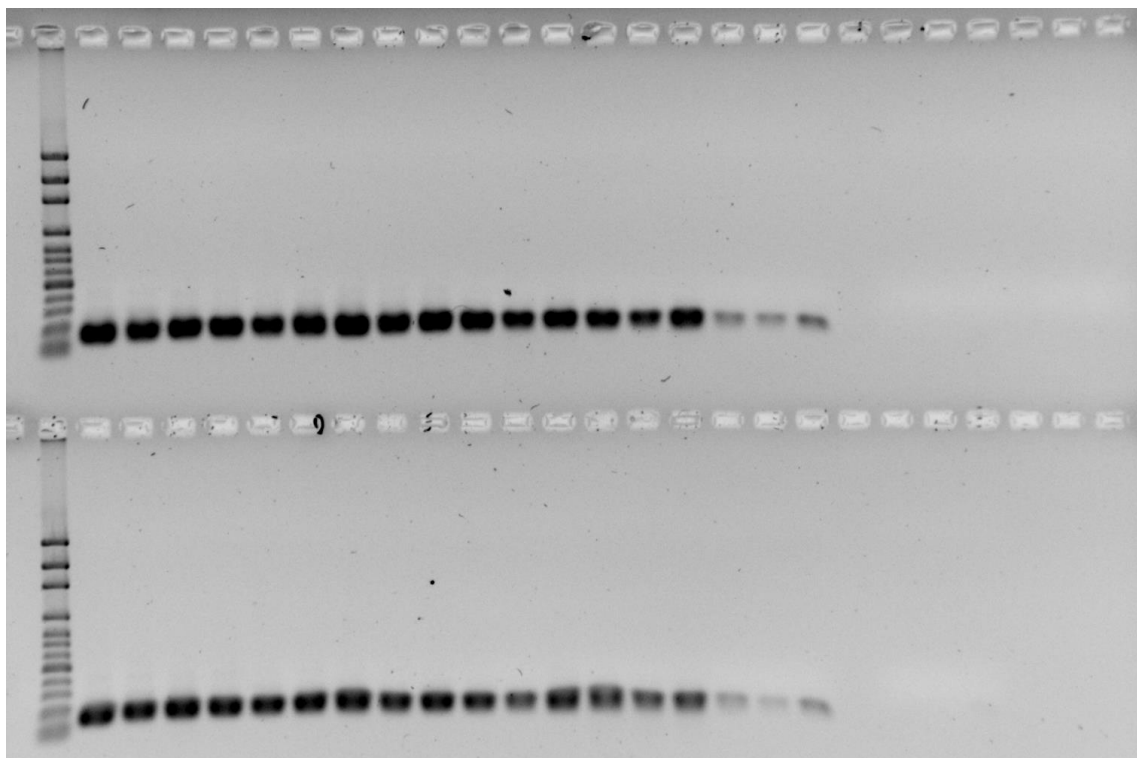

A2\_EZ DNA Methylation; top: sulphonation 1x, bottom: sulphonation 2x

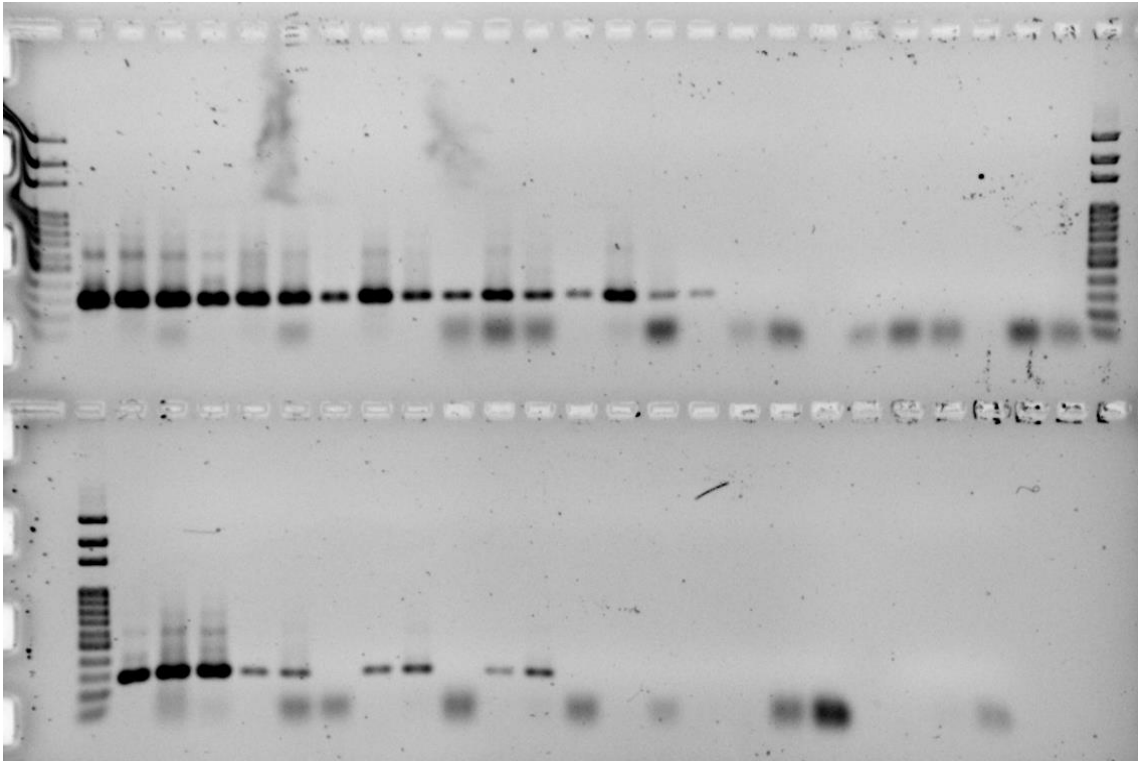

A2\_EZ DNA Methylation-Gold; top: sulphonation 1x, bottom: sulphonation 2x

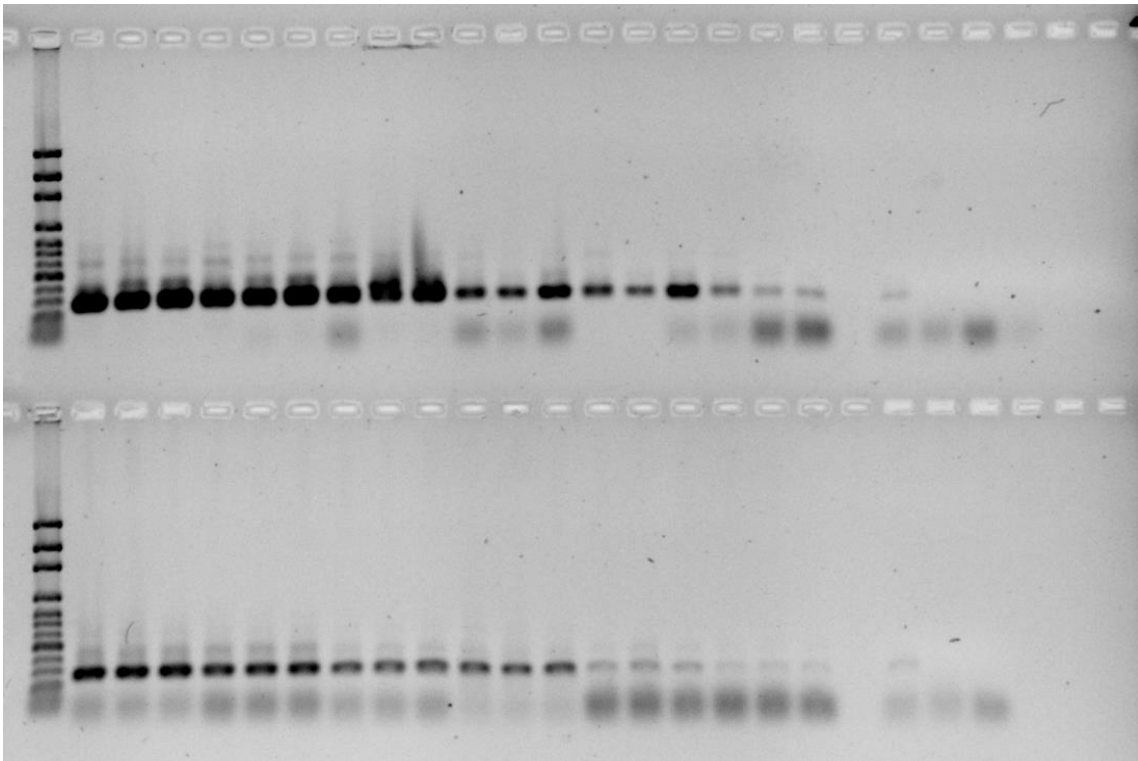

A2\_EZ DNA Methylation-Lightning; top: sulphonation 1x, bottom: sulphonation 2x

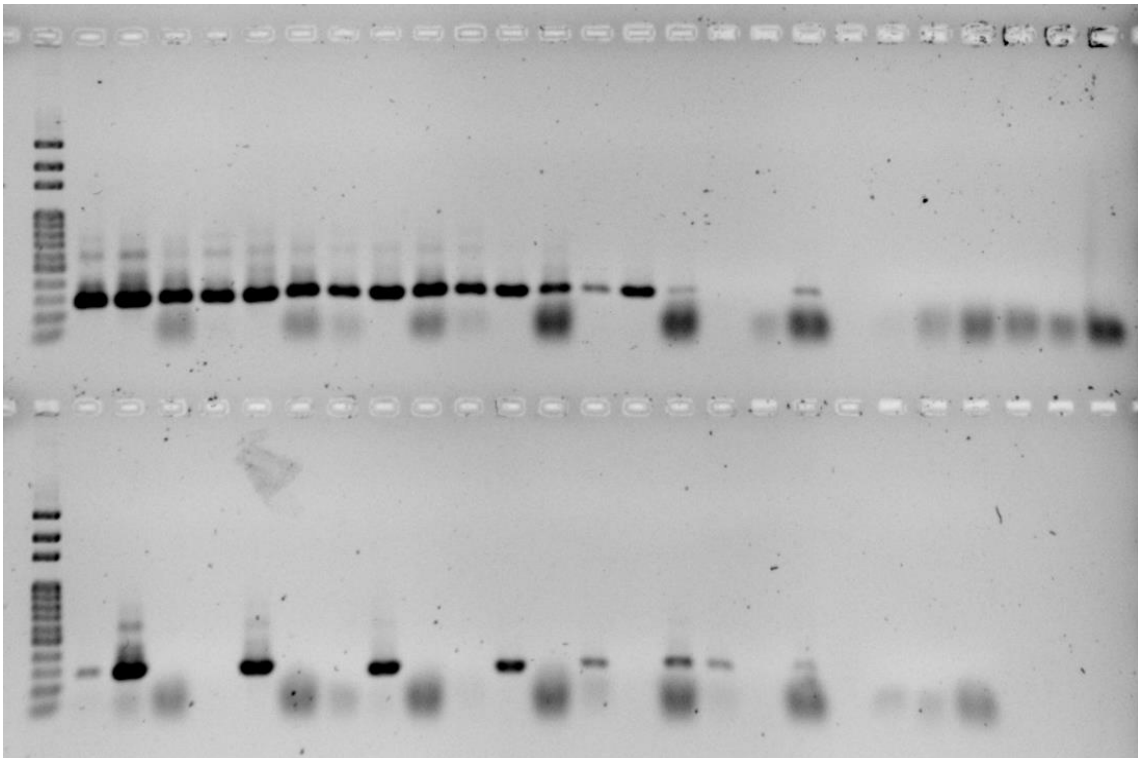

A2\_EpiTect Bisulfite; top: sulphonation 1x, bottom: sulphonation 2x

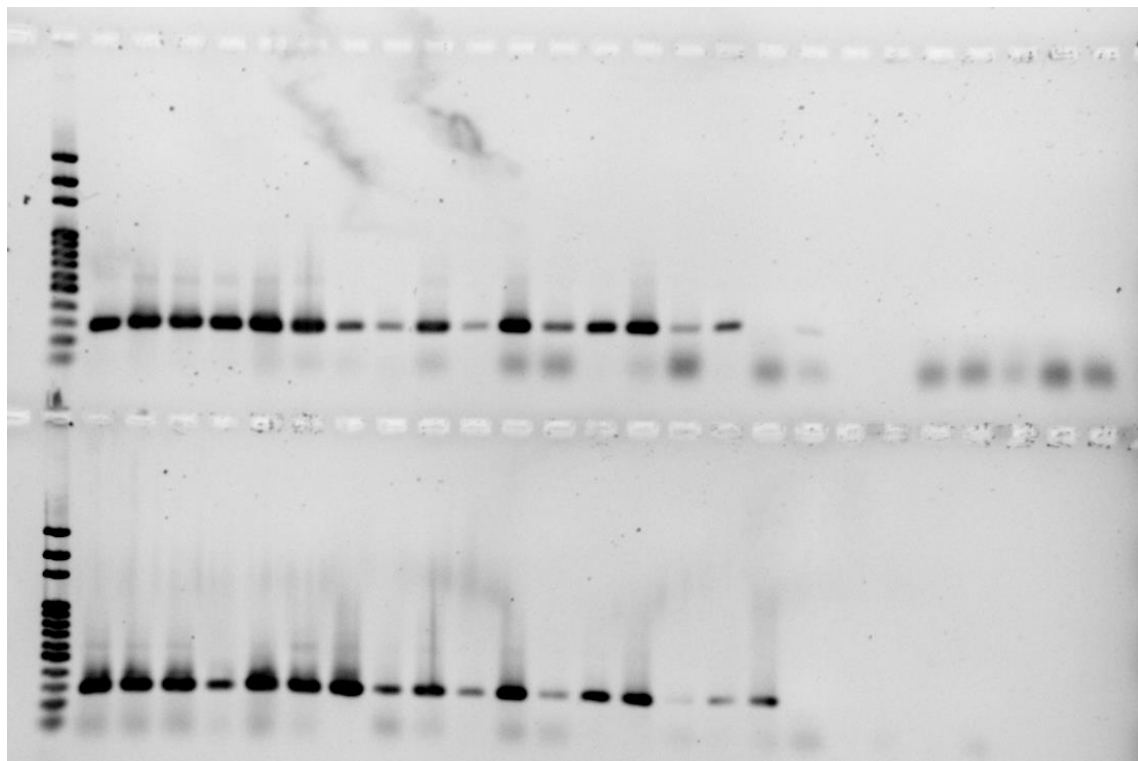

A2\_EpiTect Fast Bisulfite; top: sulphonation 1x, bottom: sulphonation 2x

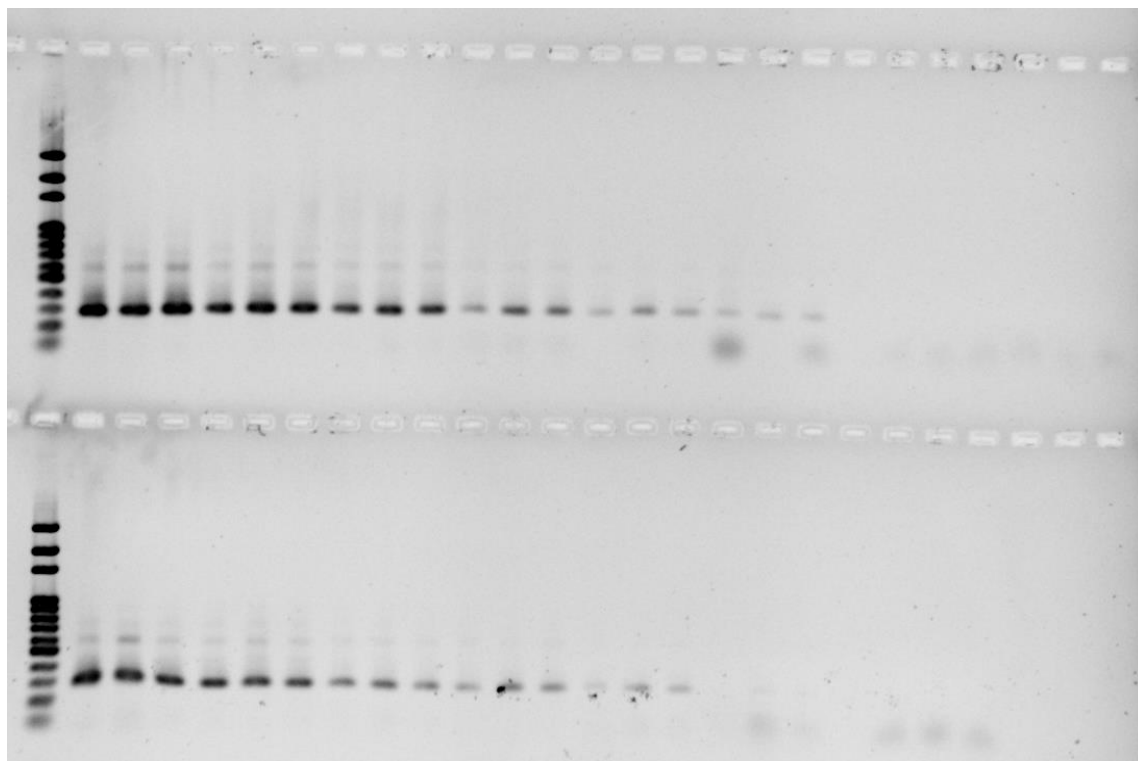

A2\_TrueMethyl Seq; top: sulphonation 1x, bottom: sulphonation 2x

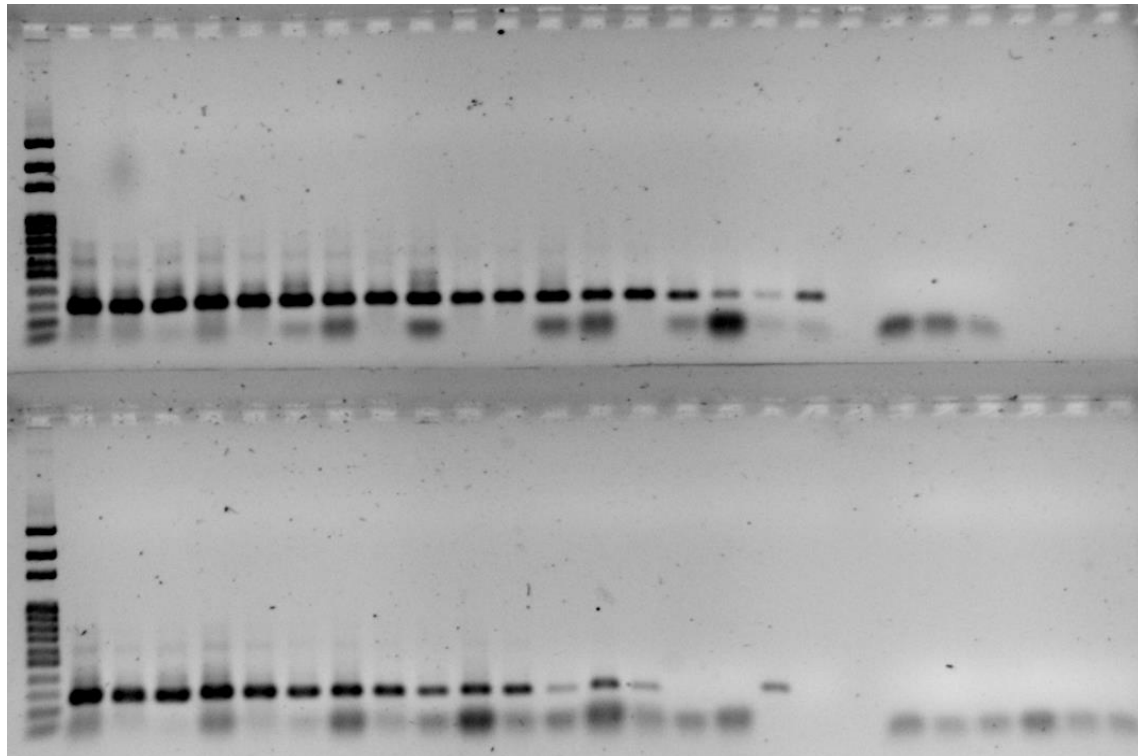



A2\_innuCONVERT; top: sulphonation 1x, bottom: sulphonation 2x

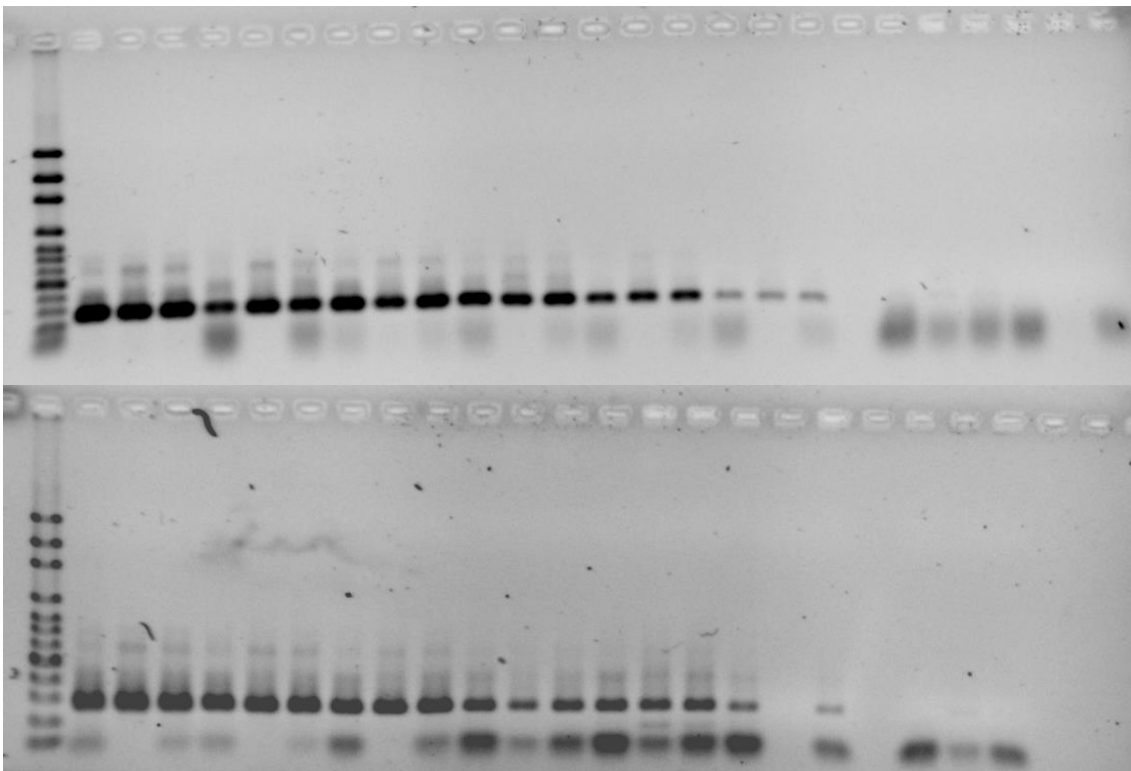

A2\_OPTI-Bisulfite; top: sulphonation 1x, bottom: sulphonation 2x

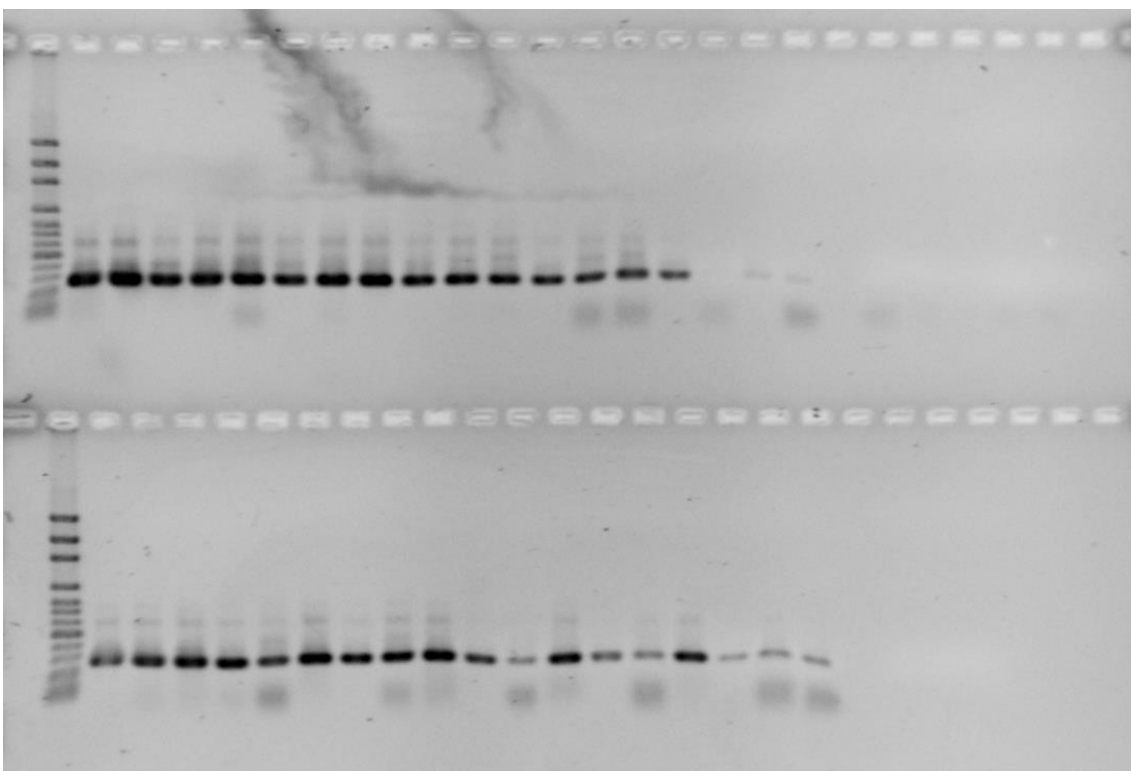

A3\_EZ DNA Methylation; top: sulphonation 1x, bottom: sulphonation 2x

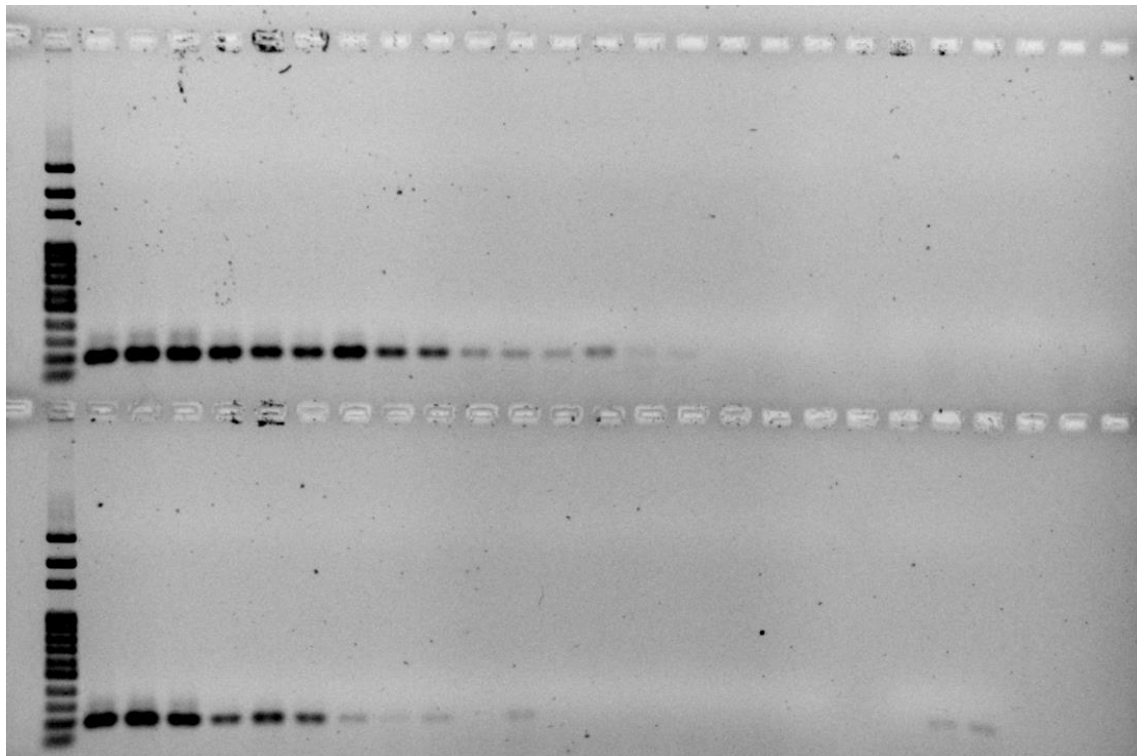

A3\_EZ DNA Methylation-Gold; top: sulphonation 1x, bottom: sulphonation 2x

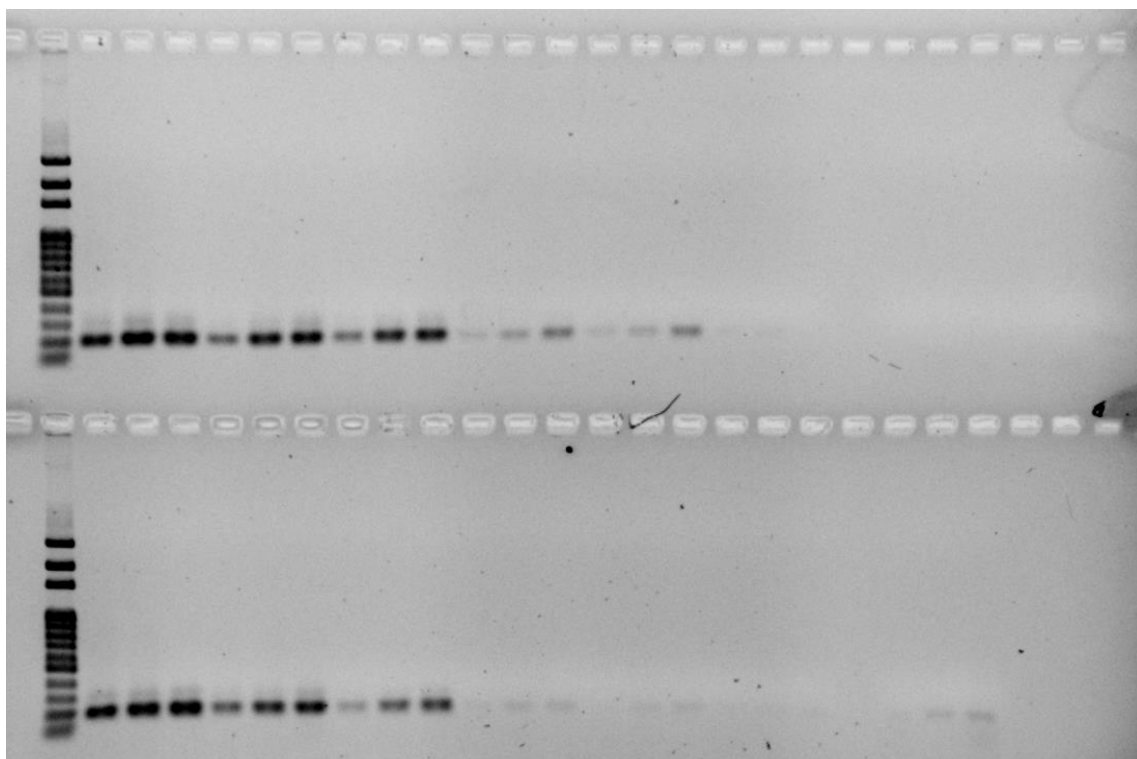

A3\_EZ DNA Methylation-Lightning; top: sulphonation 1x, bottom: sulphonation 2x

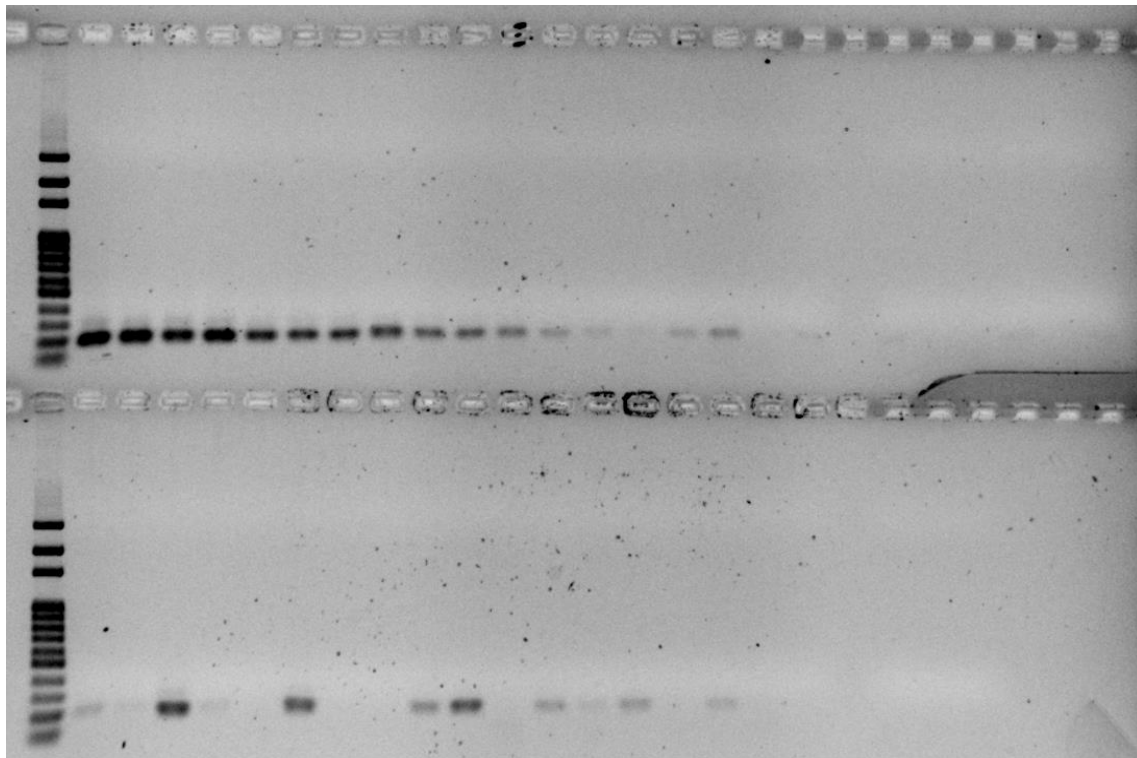

A3\_EpiTect Bisulfite; top: sulphonation 1x, bottom: sulphonation 2x

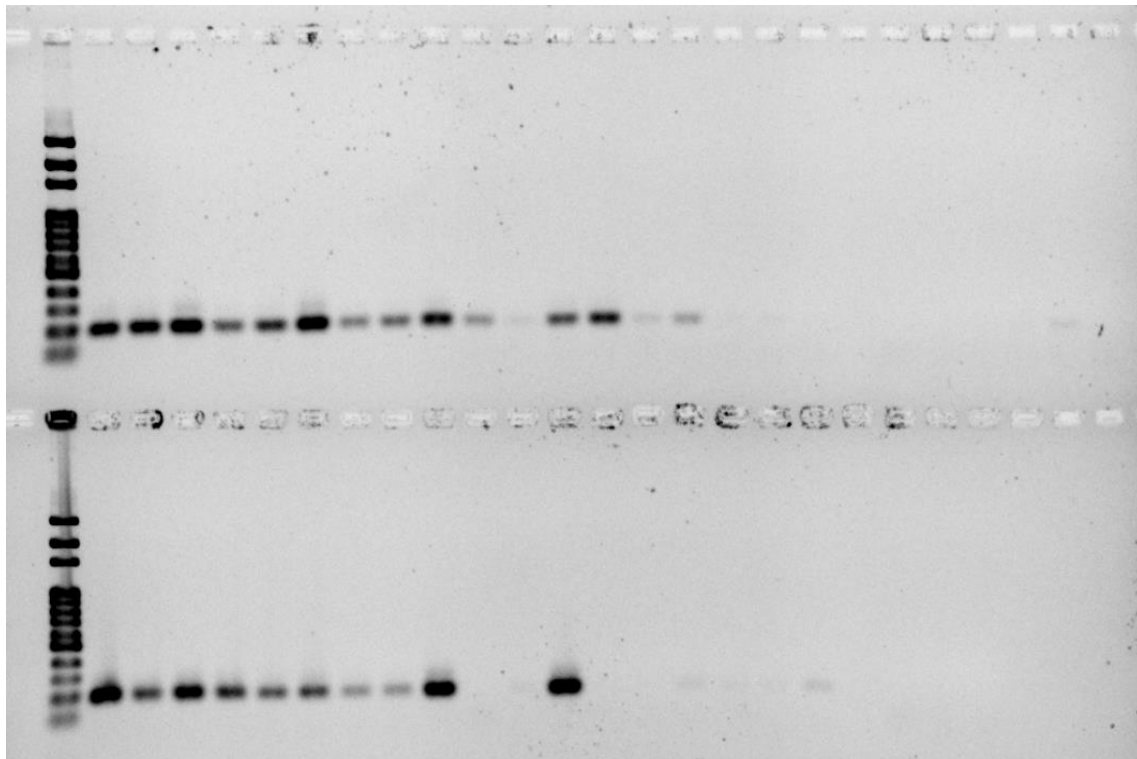

A3\_EpiTect Fast Bisulfite; top: sulphonation 1x, bottom: sulphonation 2x

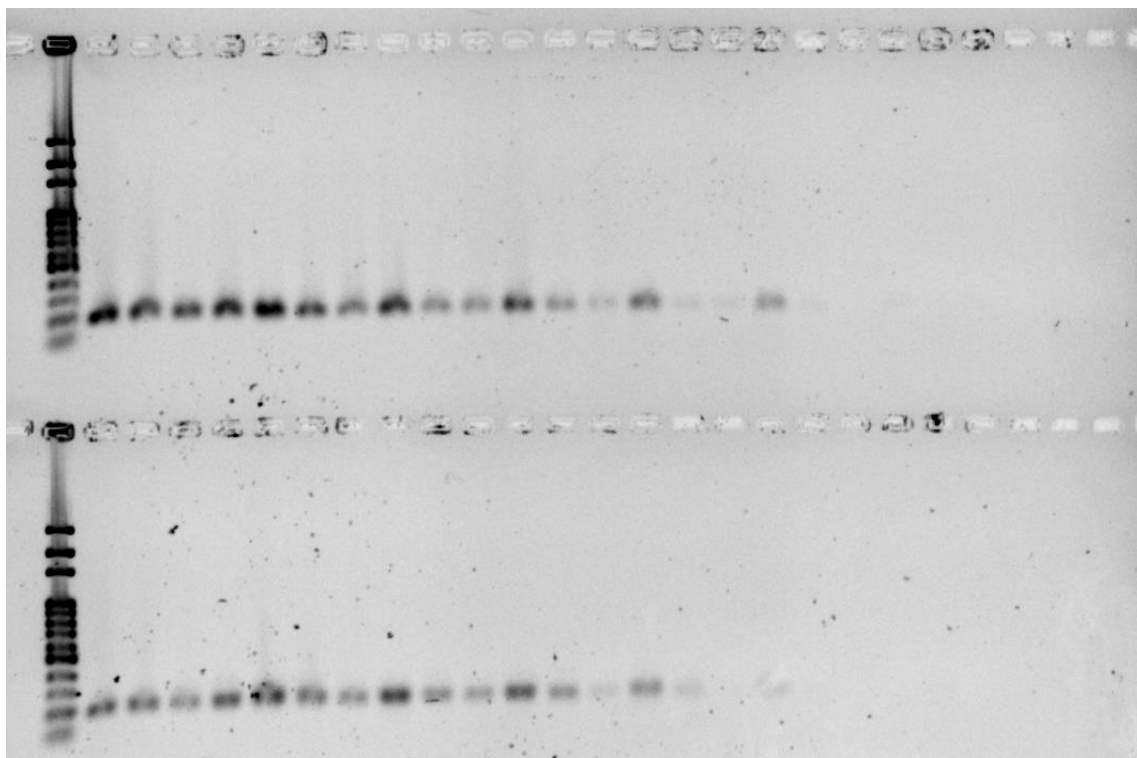

A3\_TrueMethyl Seq; top: sulphonation 1x, bottom: sulphonation 2x

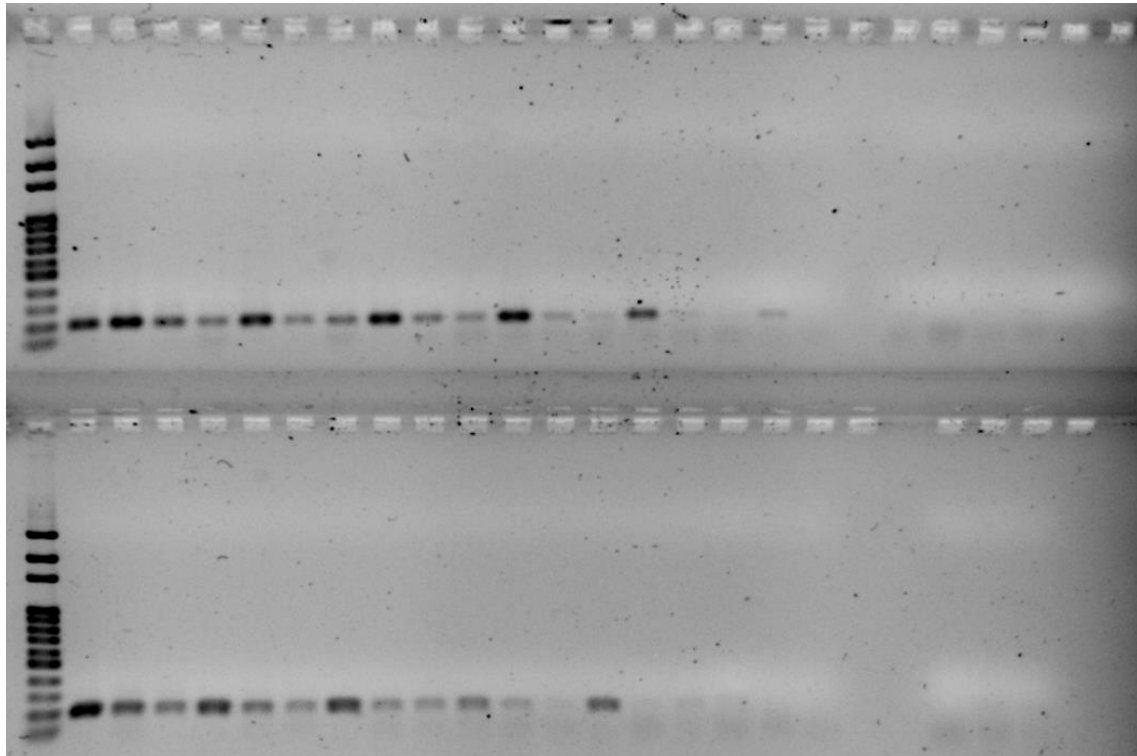



A3\_innuCONVERT; top: sulphonation 1x, bottom: sulphonation 2x

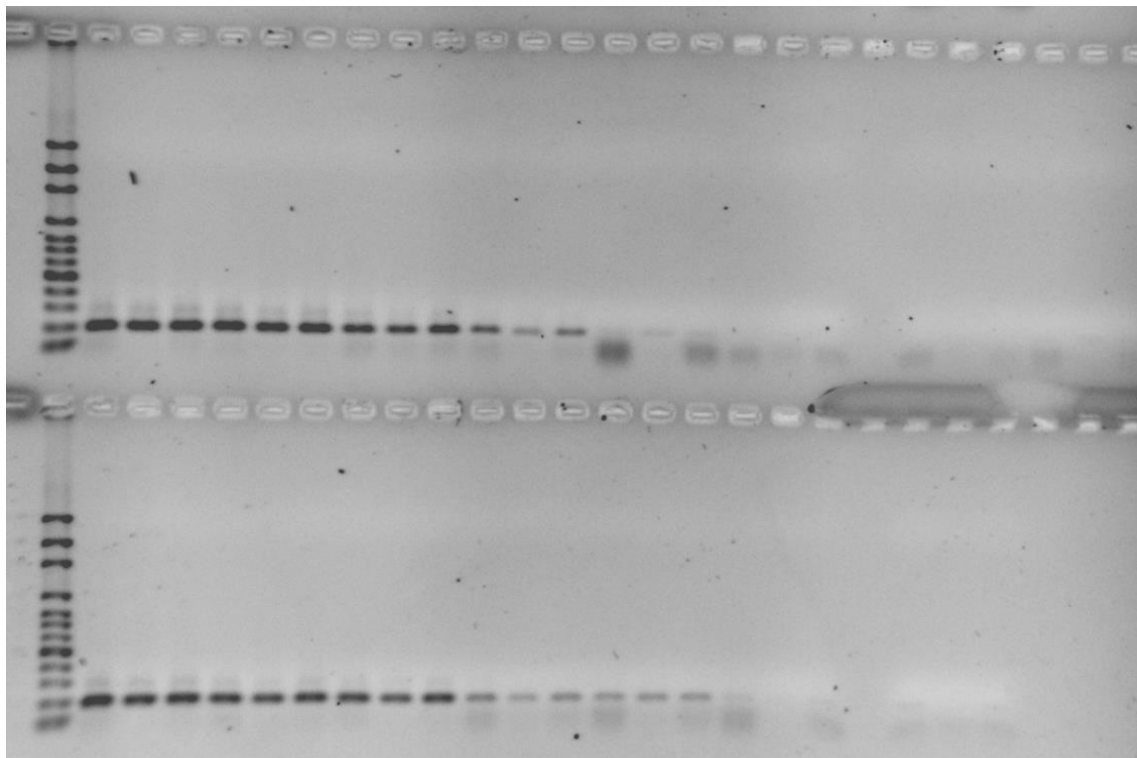

A3\_OPTI-Bisulfite; top: sulphonation 1x, bottom: sulphonation 2x

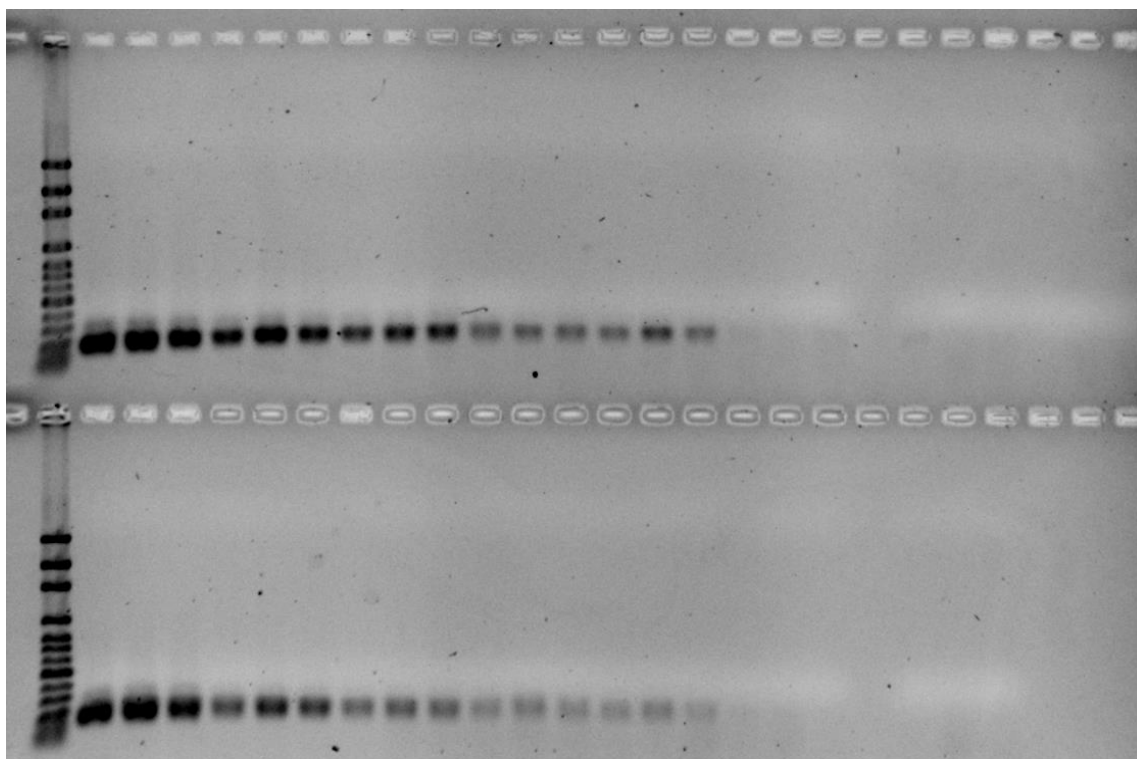

## Figure explanation

Lane 1: marker 100 bp ladder  
Lane 2: 100 ng PBL-DNA replicate 1  
Lane 3: 100 ng PBL-DNA replicate 2  
Lane 4: 100 ng PBL-DNA replicate 3  
Lane 5: 50 ng PBL-DNA replicate 1  
Lane 6: 50 ng PBL-DNA replicate 2  
Lane 7: 50 ng PBL-DNA replicate 3  
Lane 8: 25 ng PBL-DNA replicate 1  
Lane 9: 25 ng PBL-DNA replicate 2  
Lane 10: 25 ng PBL-DNA replicate 3  
Lane 11: 10 ng PBL-DNA replicate 1  
Lane 12: 10 ng PBL-DNA replicate 2  
Lane 13: 10 ng PBL-DNA replicate 3  
Lane 14: 5 ng PBL-DNA replicate 1  
Lane 15: 5 ng PBL-DNA replicate 2  
Lane 16: 5 ng PBL-DNA replicate 3  
Lane 17: 1 ng PBL-DNA replicate 1  
Lane 18: 1 ng PBL-DNA replicate 2  
Lane 19: 1 ng PBL-DNA replicate 3  
Lane 20: -  
Lane 21: NPC replicate 1  
Lane 22: NPC replicate 2  
Lane 23: NPC replicate 3  
Top lane 24: PCR NTC replicate 1  
Top lane 25: PCR NTC replicate 2  
Top lane 26: PCR NTC replicate 3
