# Supplementary material for: Comprehensive Evaluation of Commercial Bisulfite-Based DNA Methylation Kits and Development of an Alternative Protocol With Improved Conversion Performance
Source: PubMed Central journal article supplement — Genet Epigenet. 2018 Mar 22;10:1179237X18766097. doi: 10.1177/1179237X18766097 (PMC5888801; doi:10.1177/1179237x18766097), 2018-03-22
Supplement: 766097_supplementary_file_1.pdf [file 766097_supplementary_file_1.pdf]

## OPTI-Bisulfite treatment protocol

### For up to 10 reactions:

- weigh 58 mg bisulfite powder and solve completely in 763.5 µl fresh MilliQ
- add 183.5 µl 3M NaOH to the bisulfite solution
- weigh 14 mg scavenger powder and solve completely in 394.8 µl 1,4-Dioxane

### For up to 20 reactions:

- weigh 1.16 g bisulfite powder and solve completely in 1.527 ml fresh MilliQ
- add 367 µl 3M NaOH to the bisulfite solution
- weigh 28 mg scavenger powder and solve completely in 789.6 µl 1,4-Dioxane

### Sulfonation and deamination:

- add 94 µl properly mixed bisulfite/NaOH solution and 37 µl scavenger solution to 10 µl DNA (100-300ng)
- perform the following cycler program in 0.2 ml tubes in a thermal cycler (make sure that the complete reaction volume is inside the thermal block):
  - 15 min 99°C
  - 30 min 50°C
  - 5 min 99°C
  - 90 min 50°C } 2 cycles

### Washing, Desulfonation and Elution:

- pipet 400 µl M-Binding Buffer on a Zymo-Spin™ IC column and add complete sulfonation reaction
- centrifuge 30s at 13.000 rpm, discard flow-through
- pipet 100 µl M-Wash Buffer to the column and centrifuge 30s at 13.000 rpm
- pipet 200 µl M-Desulfonation Buffer to the column and incubate 20 min
- centrifuge 30s at 13.000 rpm
- pipet 200 µl M-Wash Buffer to the column and centrifuge 30s at 13.000 rpm
- pipet 200 µl M-Wash Buffer to the column and centrifuge 30s at 13.000 rpm
- place column in a fresh 1.5ml tube and pipet 20 µl M-Elution Buffer or MilliQ onto the membrane
- to elute bisulfite-converted DNA, centrifuge 30s at 13.000 rpm

**In case DNA amount is low or when sequencing library preparation is performed (e.g. RRBS) elution volume can be reduced to 10 µl !**

### Materials:

|                        |               |                         |
|------------------------|---------------|-------------------------|
| Sodium metabisulfite   | VWR           | Darmstadt, Germany      |
| Scavenger (Trolox)     | Sigma-Aldrich | St.Louis, Missouri, USA |
| NaOH                   | Sigma-Aldrich | St.Louis, Missouri, USA |
| 1,4-Dioxane            | VWR           | Darmstadt, Germany      |
| Zymo-Spin™ IC columns  | Zymo Research | Irvine, California, USA |
| M-Binding Buffer       | Zymo Research | Irvine, California, USA |
| M-Wash Buffer          | Zymo Research | Irvine, California, USA |
| M-Desulfonation Buffer | Zymo Research | Irvine, California, USA |
| M-Elution Buffer       | Zymo Research | Irvine, California, USA |
